# Supplementary material for: Catalytic graphitization of pyrolysis oil for anode application in lithium-ion batteries
Source: Royal Society of Chemistry journal article supplement (doi:10.1039/d4gc01647e), 2024-01-01
Supplement: d4gc01647e1.pdf [file d4gc01647e1.pdf]

Supplementary Information

**Catalytic Graphitization of Pyrolysis Oil for Anode Application in Lithium-ion Batteries**

Shaikat Chandra Dey,<sup>a</sup> Lillian Lower,<sup>b</sup> Trevor Vook,<sup>b</sup> Md. Nazrul Islam,<sup>a</sup> William Joe Sagues,<sup>b</sup>  
Sang-Don Han,<sup>c,d</sup> Mark R. Nimlos,<sup>e</sup> Stephen S. Kelley<sup>a</sup> and Sunkyu Park<sup>a\*</sup>

<sup>a</sup>Department of Forest Biomaterials, North Carolina State University, Campus Box 8005,  
Raleigh, NC 27695, USA. E-mail: sunkyu\_park@ncsu.edu

<sup>b</sup>Department of Biological and Agricultural Engineering, North Carolina State University, 3110  
Faucette Dr., Raleigh, NC 27695, USA

<sup>c</sup>Department of Chemistry, Sejong University, 209 Neungdong-ro, Seoul, 05006, Republic of  
Korea

<sup>d</sup>Materials, Chemical, and Computational Science Directorate, National Renewable Energy  
Laboratory, 15013 Denver West Parkway, Golden, CO 80401, USA

<sup>e</sup>Bioenergy Science and Technology Directorate, National Renewable Energy Laboratory, 15013  
Denver West Parkway, Golden, CO 80401, USA

**Table S1.** Crystallite size ( $L_c$ ,  $L_a$ ), interlayer separation ( $d_{002}$ ), and Raman intensity ratio ( $I_D/I_G$ ) of biographites prepared with different iron loading.

| <b>Iron loading</b> | <b><math>L_c</math> (Å)</b> | <b><math>L_a</math> (Å)</b> | <b><math>d_{002}</math> (nm)</b> | <b><math>I_D/I_G</math></b> |
|---------------------|-----------------------------|-----------------------------|----------------------------------|-----------------------------|
| 0.00 × FC           | 27                          | 122                         | 0.3422                           | 0.98                        |
| 0.25 × FC           | 48                          | 238                         | 0.3384                           | 0.98                        |
| 0.50 × FC           | 65                          | 375                         | 0.3359                           | 0.99                        |
| 0.75 × FC           | 89                          | 428                         | 0.3350                           | 0.81                        |
| 1.00 × FC           | 160                         | 403                         | 0.3364                           | 0.62                        |
| 1.25 × FC           | 134                         | 532                         | 0.3359                           | 0.72                        |
| 1.50 × FC           | 180                         | 644                         | 0.3353                           | 0.41                        |
| 1.75 × FC           | 179                         | 706                         | 0.3345                           | 0.42                        |
| 2.00 × FC           | 179                         | 615                         | 0.3352                           | 0.38                        |
| 2.25 × FC           | 240                         | 370                         | 0.3354                           | 0.52                        |
| 2.50 × FC           | 233                         | 390                         | 0.3347                           | 0.20                        |
| 2.75 × FC           | 218                         | 416                         | 0.3350                           | 0.34                        |
| 3.00 × FC           | 177                         | 418                         | 0.3355                           | 0.43                        |

**Table S2.** Distribution of elements in raw pyrolysis oil and biographite (2.50×FC iron loading) using XRF technique.

| <b>Element (%)</b> | <b>Pyrolysis oil</b> | <b>Biographite</b> |
|--------------------|----------------------|--------------------|
| C                  | 99.817<br>(organics) | 99.861             |
| Al                 | 0.009                | 0.027              |
| Si                 | 1.5 ppm              | 0.012              |
| P                  | 0.031                | 0.018              |
| S                  | 0.115                | 0.009              |
| Cl                 | ND*                  | 0.009              |
| Ca                 | 0.009                | 0.007              |
| Ti                 | ND                   | 5.5 (ppm)          |
| Fe                 | 1.7 (ppm)            | 0.049              |
| Ni                 | ND                   | 1.1 (ppm)          |
| Cu                 | 2.8 (ppm)            | 1.2 (ppm)          |
| Zn                 | ND                   | 0.3 (ppm)          |
| Br                 | ND                   | 5.1 (ppm)          |
| Sn                 | 0.002                | 0.003              |
| Te                 | 0.003                | 0.004              |
| K                  | 0.012                | ND                 |
| Sb                 | 0.001                | ND                 |
| Hf                 | 1.7 (ppm)            | ND                 |

\*ND: Not Detected

**Table S3.** The characteristic (002) peak position of biographite and corresponding peak intensity at different temperatures (heating and cooling) calculated from the *in-situ* XRD patterns.

| <b>Temperature (°C)</b> | <b>(002) peak position (degrees)</b> | <b>(002) peak intensity (counts)***</b> |
|-------------------------|--------------------------------------|-----------------------------------------|
| H-600 °C*               | -                                    | -                                       |
| H-700 °C                | -                                    | -                                       |
| H-800 °C                | -                                    | -                                       |
| H-900 °C                | -                                    | -                                       |
| H-1000 °C               | -                                    | -                                       |
| H-1100 °C               | 25.95                                | 4584                                    |
| H-1200 °C               | 26.03                                | 5718                                    |
| C-1100 C**              | 26.14                                | 5979                                    |
| C-1000 °C               | 26.19                                | 6128                                    |
| C-900 °C                | 26.22                                | 6587                                    |
| C-800 °C                | 26.27                                | 6423                                    |
| C-700 °C                | 26.27                                | 6485                                    |

|          |       |      |
|----------|-------|------|
| C-600 °C | 26.32 | 6719 |
| C-25 °C  | 26.37 | 6834 |

\*H stands for heating stage

\*\*C stands for cooling stage

\*\*\*The (002) peak intensity values reported here included the background signal. Therefore, the actual intensities of these peaks were much smaller. The smaller peak intensity of biographite formed at 1100 °C during heating was clearly understood from **Figure S4d**.

**Table S4.** Biographite (2.50×FC iron loading) crystal parameters as a function of aging time (month).

| No. of Exp. | Time (month) | $L_c$ (Å) | $d_{002}$ (nm) | $I_{002} \times 1000^*$ (counts) |
|-------------|--------------|-----------|----------------|----------------------------------|
| 1.          | 0            | 233       | 0.3347         | 330                              |
| 2.          | 6            | 203       | 0.3350         | 18                               |
| 3.          | 8            | 193       | 0.3349         | 25                               |
| 4.          | 9            | 190       | 0.3353         | 21                               |

\*Intensity of characteristic (002) peak.

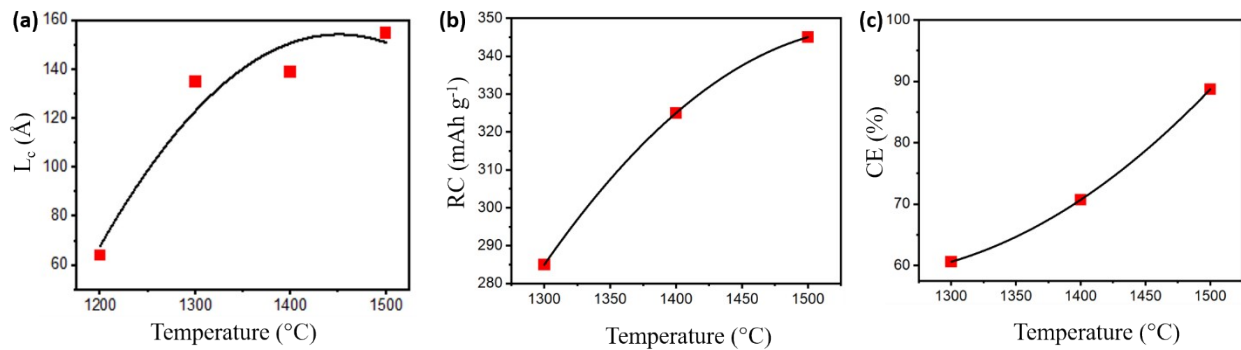

**Figure S1.** Effect of graphitization temperature on (a) crystallite size, (b) reversible capacity, and (c) Coulombic efficiency.

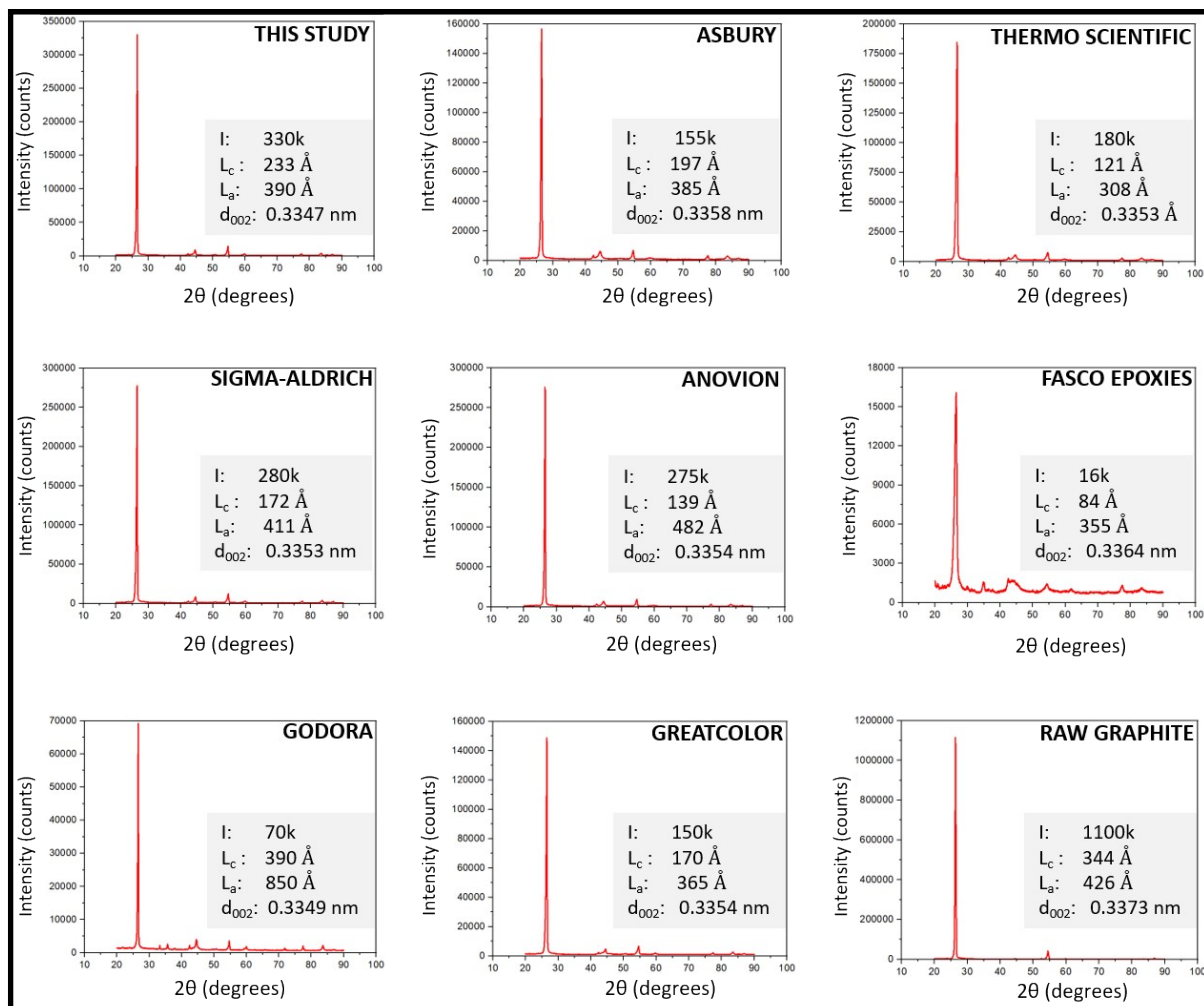

**Figure S2.** Comparison of the XRD pattern of optimal biographite (this study) with some commercial graphite samples. Intensity (I) of the characteristic (002) peak is highlighted (insets) along with other crystal parameters ( $L_c$ ,  $L_a$ , and  $d_{002}$ ) of graphite.

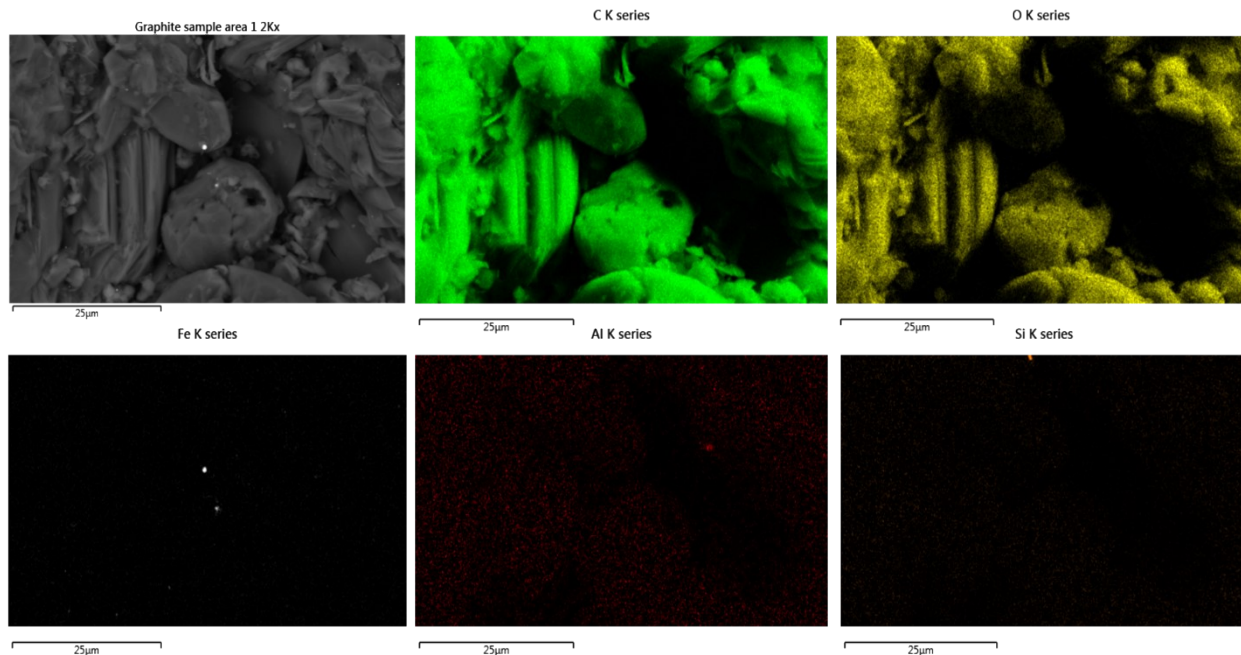

**Figure S3.** EDS elemental mapping of optimal biographite showing the presence of carbon (C), oxygen (O), iron (Fe), aluminum (Al), and silicon (Si).

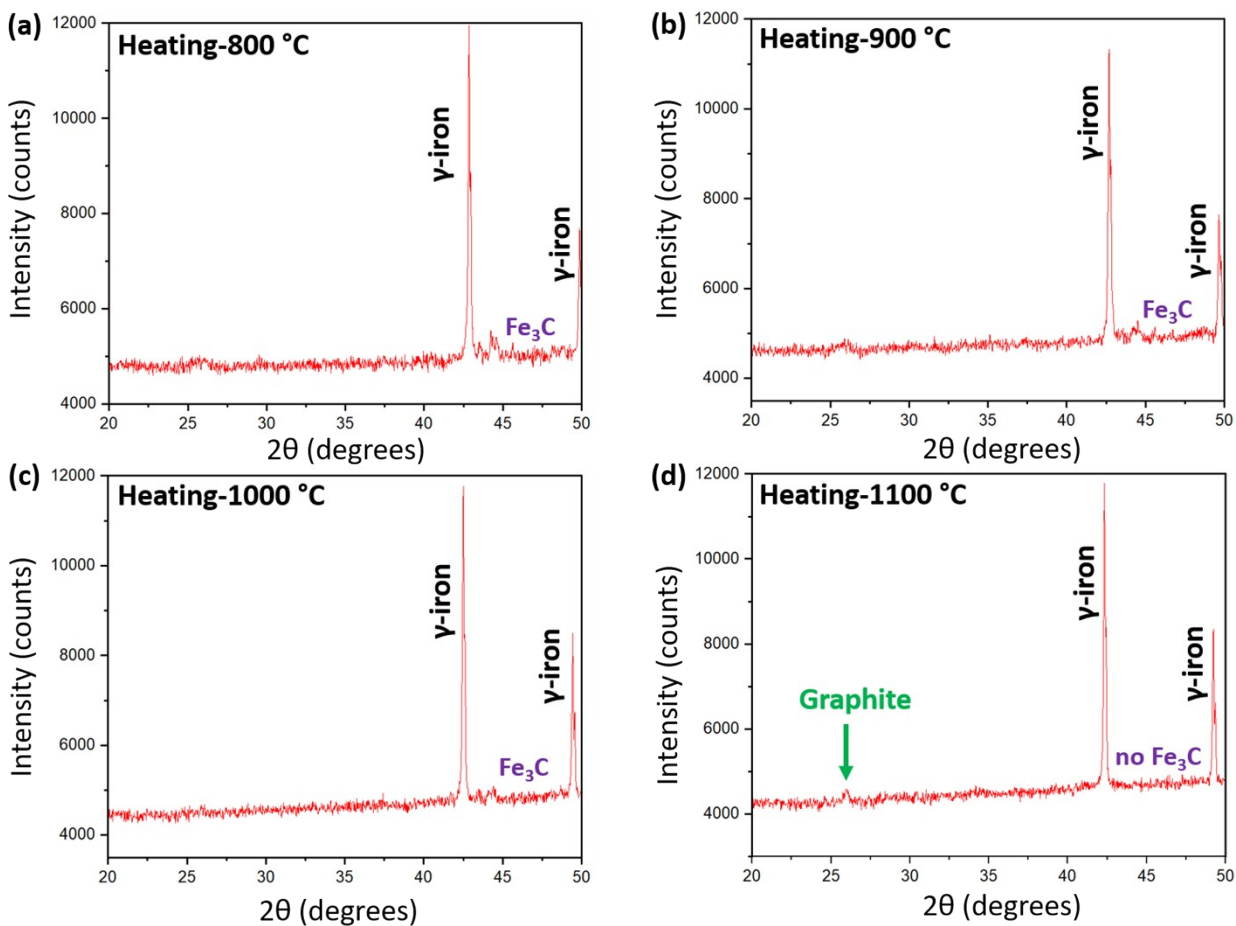

**Figure S4.** The *in-situ* XRD patterns recorded during heating at (a) 800, (b) 900, (c) 1000, and (d) 1100 °C respectively.

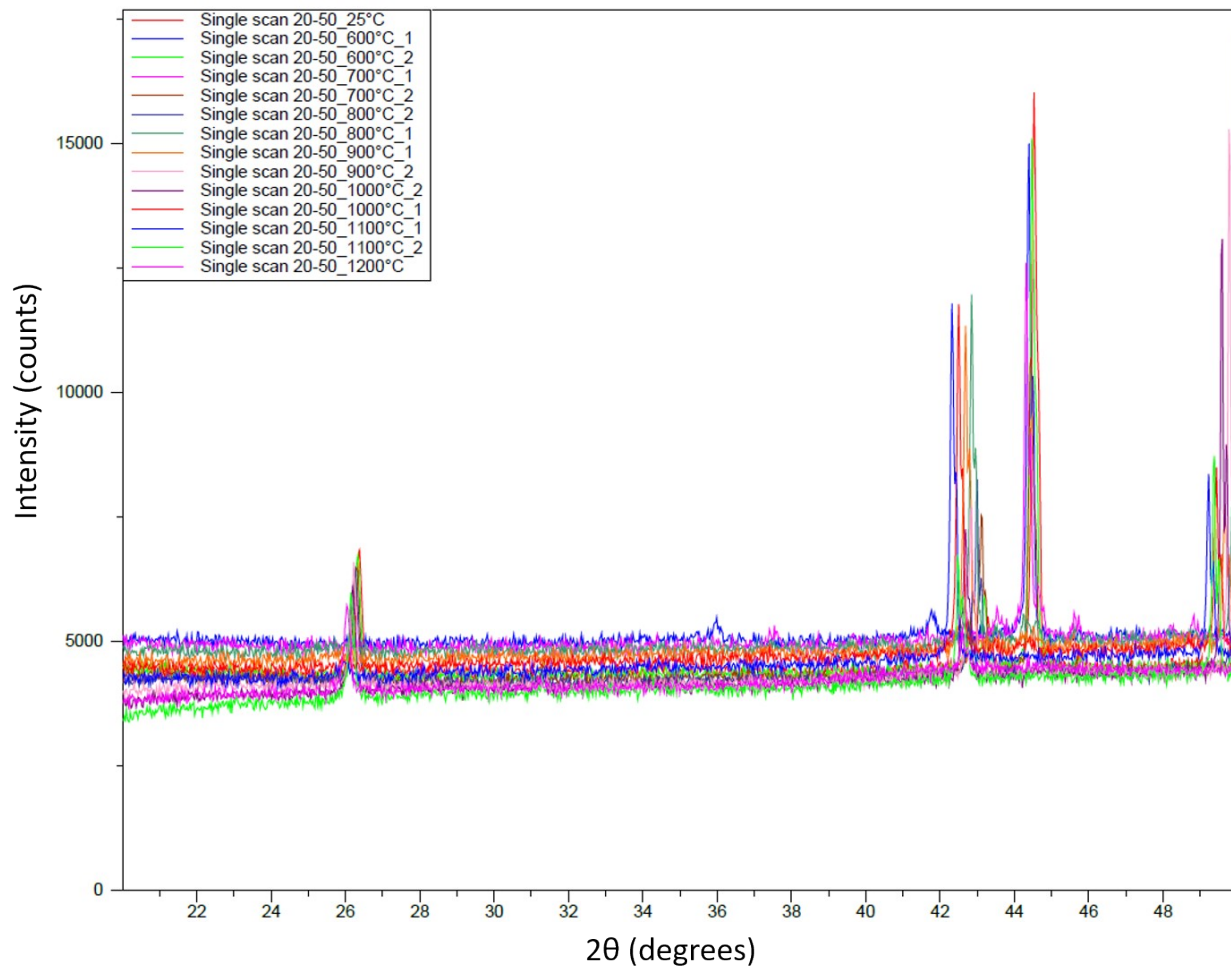

**Figure S5.** The overlay *in-situ* XRD patterns recorded during both heating and cooling.

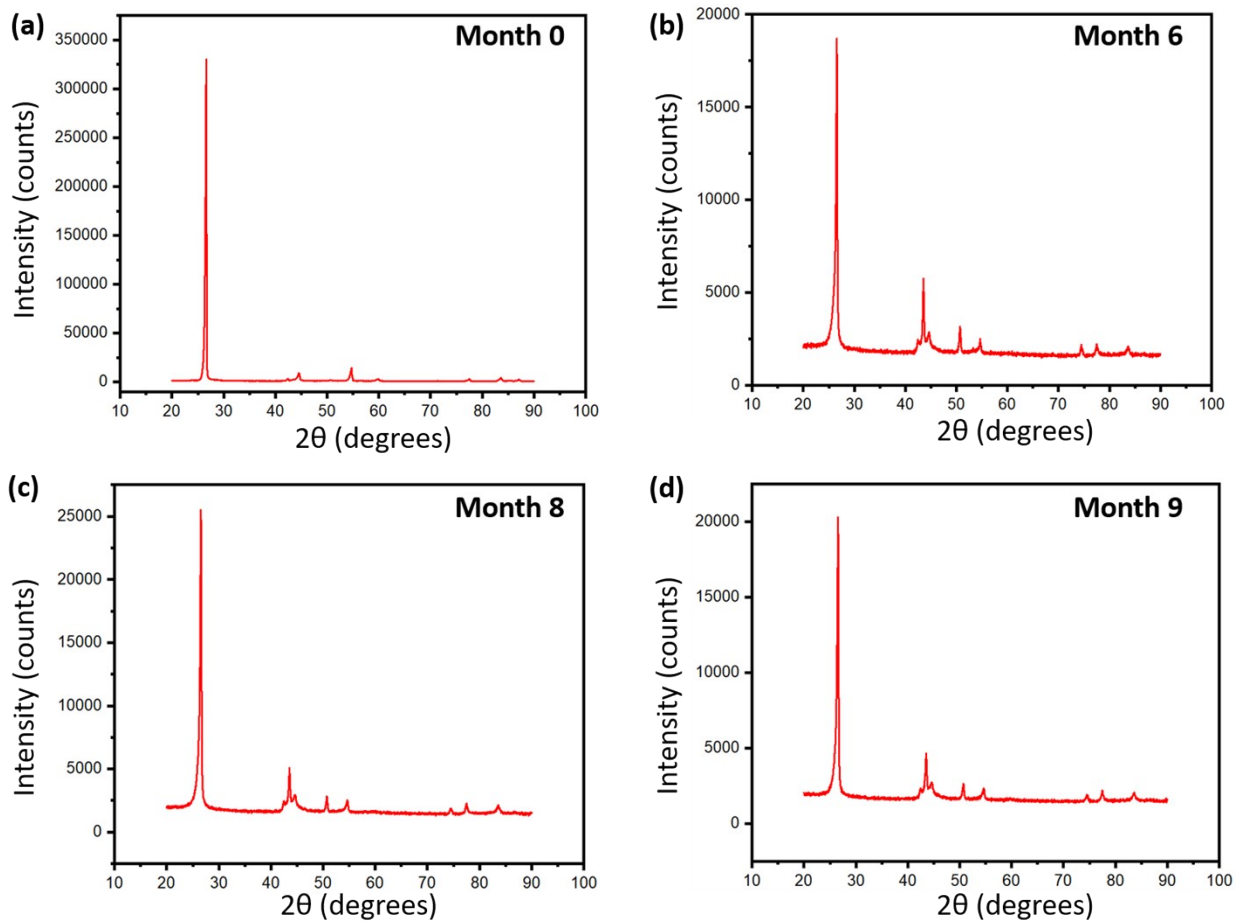

**Figure S6.** Effect of aging time on the XRD patterns of biographite (2.50×FC iron loading) at (a) month 0, (b) month 6, (c) month 8, and (d) month 9.
